# Supplementary material for: Higher Long-term Visit-to-Visit Variability in Fasting Plasma Glucose Predicts New-Onset Heart Failure in the General Population
Source: Research Square preprint supplement (doi:10.21203/rs.3.rs-1183160/v1), 2021-12-21
Supplement: Supplementary file 1 [file be4fbf1b260b577ead4104c0.pdf]

**- Supplement materials –**

## **Supplementary Tables**

**Table S1. Baseline Characteristics of the Study Cohort**

**Table S2. Baseline Characteristics Grouped by the Variability Independent of the Mean of Fasting Plasma Glucose Levels**

**Table S3. Baseline Characteristics Grouped by the Coefficient of Variability of Fasting Plasma Glucose Levels**

**Table S4. Baseline Characteristics Grouped by Standard Deviation of Fasting Plasma Glucose Levels**

**Table S5. Subgroup Analyses (Impact of the Average Real Variability of Fasting Plasma Glucose Levels)**

**Table S6. Subgroup Analyses (Impact of the Variability Independent of the Mean of Fasting Plasma Glucose Level)**

**Table S7. Subgroup Analyses (Impact of the Coefficient of Variability of Fasting Plasma Glucose Level)**

**Table S8. Subgroup Analyses (Impact of Standard Deviation of Fasting Plasma Glucose Level)**

**Table S1. Baseline Characteristics of the Study Cohort**

| <b>Variables</b>               | <b>Total<br/>N=98554</b> | <b>HF (-)<br/>N=97336</b> | <b>HF (+)<br/>N=1218</b> | <b>P<br/>value</b> |
|--------------------------------|--------------------------|---------------------------|--------------------------|--------------------|
| Age, y                         | 53.63±12.34              | 53.49±12.29               | 64.76±11.11              | <0.01              |
| Male sex, n (%)                | 77688 (78.83)            | 76648 (78.75)             | 1040 (85.39)             | <0.01              |
| <b>Comorbidities</b>           |                          |                           |                          |                    |
| Hypertension, n (%)            | 15490 (15.72)            | 15088 (15.50)             | 402 (33.00)              | <0.01              |
| Diabetes mellitus, n (%)       | 4388 (4.45)              | 4243 (4.36)               | 145 (11.90)              | <0.01              |
| Dyslipidemia, n (%)            | 4648 (4.72)              | 4573 (4.70)               | 75 (6.16)                | 0.02               |
| CKD, eGFR <60 mL/min, n (%)    | 8359 (8.48)              | 8120 (8.34)               | 239 (19.62)              | <0.01              |
| <b>Medications</b>             |                          |                           |                          |                    |
| Antihypertensive agents, n (%) | 14392 (14.60)            | 14012 (14.40)             | 380 (31.20)              | <0.01              |
| Hypoglycemic agents, n (%)     | 3805 (3.86)              | 3671 (3.77)               | 134 (11.00)              | <0.01              |
| Lipid-lowers agents, n (%)     | 969 (0.98)               | 940 (0.97)                | 29 (2.38)                | <0.01              |
| <b>Lifestyle</b>               |                          |                           |                          |                    |
| Current smoker, n (%)          | 33595 (34.09)            | 33259 (34.17)             | 336 (27.59)              | <0.01              |
| Current alcohol use, n (%)     | 34799 (35.31)            | 34499 (35.44)             | 300 (24.63)              | <0.01              |
| Regular exercise, n (%)        | 69113 (70.13)            | 68217 (70.08)             | 896 (73.56)              | <0.01              |
| Low-income level, n (%)        | 51514 (52.27)            | 50852 (52.24)             | 662 (54.35)              | 0.14               |
| <b>Health examination</b>      |                          |                           |                          |                    |
| Body weight, kg                | 71.13±11.28              | 71.11±11.28               | 72.50±11.81              | <0.01              |
| BMI, kg/m <sup>2</sup>         | 25.08±3.40               | 25.07±3.39                | 25.78±3.74               | <0.01              |
| RHR, bpm                       | 73.64±10.49              | 73.60±10.46               | 76.75±12.56              | <0.01              |
| SBP, mmHg                      | 132.01±20.13             | 131.86±20.05              | 143.91±22.44             | <0.01              |
| DBP, mmHg                      | 84.71±11.16              | 84.68±11.15               | 87.30±12.21              | <0.01              |
| FPG, mmol/L                    | 5.69±1.85                | 5.68±1.84                 | 6.36±2.39                | <0.01              |
| TC, mmol/L                     | 5.01±1.38                | 5.01±1.38                 | 5.20±1.18                | <0.01              |
| *TG, mmol/L                    | 1.29 (0.92, 1.92)        | 1.29 (0.92, 1.91)         | 1.31 (0.96, 1.97)        | 0.04               |
| LDL-C, mmol/L                  | 2.62±1.07                | 2.62±1.07                 | 2.79±0.94                | <0.01              |
| HDL-C, mmol/L                  | 1.54±0.53                | 1.54±0.52                 | 1.54±1.23                | 0.91               |
| eGFR, mL/min                   | 88.79±20.75              | 88.92±20.70               | 77.78±21.80              | <0.01              |
| *Hs-CRP                        | 1.20 (0.54, 2.77)        | 1.18 (0.53, 2.74)         | 1.92 (0.90, 4.26)        | <0.01              |
| The number of FBP measurements |                          |                           |                          | <0.01              |

|                 |                   |                    |                     |       |
|-----------------|-------------------|--------------------|---------------------|-------|
| 2               | 41965 (42.58)     | 41372 (42.50)      | 593 (48.69)         |       |
| 3               | 56589 (57.42)     | 55964 (57.50)      | 625 (51.31)         |       |
| FBP Variability |                   |                    |                     |       |
| *SD             | 0.43 (0.24, 0.71) | 0.42 (0.23, 0.71)  | 0.57 (0.31, 0.97)   | <0.01 |
| *ARV            | 0.54 (0.30, 0.94) | 0.54 (0.30, 0.93)  | 0.72 (0.39, 1.26)   | <0.01 |
| *CV             | 8.14 (4.56,13.20) | 8.12 (4.55, 13.16) | 10.07 (5.77, 16.16) | <0.01 |
| *VIM            | 0.43 (0.24, 0.71) | 0.42 (0.23, 0.71)  | 0.57 (0.31, 0.97)   | <0.01 |

---

Low-income level: income $\geq$ 800 Renminbi/month.

Continuous variables are presented as mean $\pm$ SD, and categorical variables are presented as percentage.

Abbreviations: CKD, chronic kidney disease; eGFR, estimated glomerular filtration rate; BMI, body mass index; DBP, diastolic blood pressure; SBP, systolic blood pressure; FBG, fasting blood glucose; HDL-C, high-density lipoprotein cholesterol; LDL-C, low-density lipoprotein cholesterol; RHR, resting heart rate; TC, total cholesterol; TG, triglyceride; Hs-CRP, High-sensitivity C-reactive protein; CV, coefficient of variance; SD, the standard deviation; VIM, variability independent of mean; ARV, average real variability.

\*Triglyceride levels, Hs-CRP levels are presented as median (interquartile range).

**Table S2. Baseline Characteristics Grouped by the Variability Independent of the Mean of Fasting Plasma Glucose Levels**

| <b>Variables</b>               | <b>Total</b>   | <b>Quartile 1</b> | <b>Quartile 2</b> | <b>Quartile 3</b> | <b>Quartile 4</b> | <b>P</b>     |
|--------------------------------|----------------|-------------------|-------------------|-------------------|-------------------|--------------|
|                                | <b>N=98554</b> | <b>N=24809</b>    | <b>N=24763</b>    | <b>N=27334</b>    | <b>N=21648</b>    | <b>value</b> |
| Age, y                         | 53.63±12.34    | 51.97±12.45       | 52.52±12.41       | 53.94±12.37       | 56.38±11.55       | <0.01        |
| Male sex, n (%)                | 77688 (78.83)  | 19130 (77.11)     | 19026 (76.83)     | 21762 (79.62)     | 17770 (82.09)     | <0.01        |
| Comorbidities                  |                |                   |                   |                   |                   |              |
| Hypertension, n (%)            | 15490 (15.72)  | 3204 (12.91)      | 3444 (13.91)      | 4313 (15.78)      | 4529 (20.92)      | <0.01        |
| Diabetes mellitus, n (%)       | 4388 (4.45)    | 329 (1.33)        | 330 (1.33)        | 641 (2.35)        | 3088 (14.26)      | <0.01        |
| Dyslipidemia, n (%)            | 4648(4.72)     | 933(3.76)         | 1031(4.16)        | 1335(4.88)        | 1349(6.23)        | <0.01        |
| CKD, eGFR <60 mL/min, n (%)    | 8359 (8.48)    | 1977 (7.97)       | 1898 (7.66)       | 2221 (8.13)       | 2263 (10.45)      | <0.01        |
| Medications                    |                |                   |                   |                   |                   |              |
| Antihypertensive agents, n (%) | 14392 (14.60)  | 2908 (11.72)      | 3180 (12.84)      | 4030 (14.74)      | 4274 (19.74)      | <0.01        |
| Hypoglycemic agents, n (%)     | 3805 (3.86)    | 275 (1.11)        | 269 (1.09)        | 552 (2.02)        | 2709 (12.51)      | <0.01        |
| Lipid-lowers agents, n (%)     | 969 (0.98)     | 153 (0.62)        | 199 (0.80)        | 263 (0.96)        | 354 (1.64)        | <0.01        |
| Lifestyle                      |                |                   |                   |                   |                   |              |
| Current smoker, n (%)          | 33595 (34.09)  | 8316 (33.52)      | 8162 (32.96)      | 9624 (35.21)      | 7493 (34.61)      | <0.01        |
| Current alcohol use, n (%)     | 34799 (35.31)  | 8849 (35.67)      | 8577 (34.64)      | 9894 (36.20)      | 7479 (34.55)      | <0.01        |
| Regular exercise, n (%)        | 69113 (70.13)  | 17695 (71.32)     | 17348 (70.06)     | 18946 (69.31)     | 15124 (69.86)     | <0.01        |
| Low-income level, n (%)        | 51514 (52.27)  | 13455 (54.23)     | 12771 (51.57)     | 13837 (50.62)     | 11451 (52.90)     | <0.01        |

|                                |                  |                  |                  |                  |                  |       |
|--------------------------------|------------------|------------------|------------------|------------------|------------------|-------|
| Health examination             |                  |                  |                  |                  |                  |       |
| Body weight, kg                | 71.13±11.28      | 70.51±11.29      | 70.78±11.32      | 71.09±11.19      | 72.29±11.27      | <0.01 |
| BMI, kg/m <sup>2</sup>         | 25.08±3.40       | 24.84±3.36       | 24.96±3.35       | 25.06±3.37       | 25.54±3.48       | <0.01 |
| RHR, bpm                       | 73.64±10.49      | 72.97±10.00      | 72.91±10.05      | 73.47±10.44      | 75.44±11.36      | <0.01 |
| SBP, mmHg                      | 132.01±20.13     | 129.76±20.02     | 130.09±19.56     | 132.34±19.94     | 136.35±20.41     | <0.01 |
| DBP, mmHg                      | 84.71±11.16      | 83.93±11.14      | 83.99±11.05      | 84.92±11.15      | 86.16±11.18      | <0.01 |
| FPG, mmol/L                    | 5.69±1.85        | 5.22±0.74        | 5.27±0.76        | 5.47±0.98        | 6.99±3.31        | <0.01 |
| TC, mmol/L                     | 5.01±1.38        | 4.93±1.12        | 4.96±1.37        | 5.02±1.53        | 5.13±1.43        | <0.01 |
| *TG, mmol/L                    | 1.29 (0.92,1.92) | 1.23 (0.87,1.81) | 1.24 (0.89,1.83) | 1.30 (0.93,1.90) | 1.41 (1.01,2.16) | <0.01 |
| LDL-C, mmol/L                  | 2.62±1.07        | 2.61±0.91        | 2.62±1.07        | 2.62±1.17        | 2.64±1.12        | 0.01  |
| HDL-C, mmol/L                  | 1.54±0.53        | 1.53±0.52        | 1.54±0.50        | 1.55±0.52        | 1.54±0.58        | <0.01 |
| Cr, μmol/L                     | 82.56±28.18      | 82.03±23.85      | 81.85±27.42      | 82.34±26.51      | 84.26±34.82      | <0.01 |
| eGFR, mL/min                   | 88.79±20.75      | 89.83±21.29      | 89.68±19.81      | 88.78±19.99      | 86.57±21.91      | <0.01 |
| *Hs-CRP, mg/L                  | 1.20 (0.54,2.77) | 1.13 (0.53,2.62) | 1.10 (0.50,2.60) | 1.15 (0.55,2.70) | 1.30 (0.60,3.16) | <0.01 |
| The number of FBP measurements |                  |                  |                  |                  |                  | <0.01 |
| 2                              | 41965 (42.58)    | 13557 (54.65)    | 9026 (36.45)     | 9845 (36.02)     | 9537 (44.05)     |       |
| 3                              | 56589 (57.42)    | 11252 (45.35)    | 15737 (63.55)    | 17489 (63.98)    | 12111 (55.95)    |       |
| FBP Variability                |                  |                  |                  |                  |                  |       |
| *SD                            | 0.43 (0.24,0.71) | 0.14 (0.08,0.19) | 0.33 (0.28,0.38) | 0.57 (0.49,0.65) | 1.11 (0.90,1.66) | <0.01 |
| *ARV                           | 0.54 (0.30,0.94) | 0.18 (0.10,0.25) | 0.42 (0.35,0.52) | 0.73 (0.61,0.89) | 1.49 (1.17,2.20) | <0.01 |

|     |                   |                  |                  |                    |                     |       |
|-----|-------------------|------------------|------------------|--------------------|---------------------|-------|
| *CV | 8.14 (4.56,13.20) | 2.69(1.50, 3.70) | 6.39(5.48, 7.40) | 10.71(9.30, 12.44) | 19.25(16.04, 25.25) | <0.01 |
|-----|-------------------|------------------|------------------|--------------------|---------------------|-------|

Note: Q1, the variability independent of the mean of FPG < 0.24; Q2,  $0.24 \leq$  the variability independent of the mean of FPG < 0.43; Q3,  $0.43 \leq$  the variability independent of the mean of FPG < 0.77; Q4, the variability independent of the mean of FPG  $\geq 0.77$ .

Low-income level: income  $\geq 800$  Renminbi/month.

Continuous variables are presented as mean $\pm$ SD, and categorical variables are presented as percentage.

Abbreviations: CKD, chronic kidney disease; eGFR, estimated glomerular filtration rate; Scr, serum creatinine levels; BMI, body mass index; DBP, diastolic blood pressure; SBP, systolic blood pressure; FBG, fasting blood glucose; HDL-C, high-density lipoprotein cholesterol; LDL-C, low-density lipoprotein cholesterol; RHR, resting heart rate; TC, total cholesterol; TG, triglyceride; Hs-CRP, High-sensitivity C-reactive protein; CV, coefficient of variance; SD, the standard deviation; ARV, average real variability.

\*Triglyceride levels, Hs-CRP levels, the SD of fasting plasma glucose levels, the variability independent of the mean and the coefficient of variability are presented as median (interquartile range).

**Table S3. Baseline Characteristics Grouped by the Coefficient of Variability of Fasting Plasma Glucose Levels**

| <b>Variables</b>               | <b>Total</b>   | <b>Quartile 1</b> | <b>Quartile 2</b> | <b>Quartile 3</b> | <b>Quartile 4</b> | <b>P</b>     |
|--------------------------------|----------------|-------------------|-------------------|-------------------|-------------------|--------------|
|                                | <b>N=98554</b> | <b>N=24635</b>    | <b>N=24634</b>    | <b>N=24656</b>    | <b>N=24629</b>    | <b>value</b> |
| Age, y                         | 53.63±12.34    | 52.25±12.35       | 52.66±12.31       | 53.81±12.42       | 55.79±11.97       | <0.01        |
| Male sex, n (%)                | 77688 (78.83)  | 19190 (77.90)     | 19053 (77.34)     | 19553 (79.30)     | 19892 (80.77)     | <0.01        |
| Comorbidities                  |                |                   |                   |                   |                   |              |
| Hypertension, n (%)            | 15490 (15.72)  | 3311 (13.44)      | 3561 (14.46)      | 3894 (15.79)      | 4724 (19.18)      | <0.01        |
| Diabetes mellitus, n (%)       | 4388 (4.45)    | 465 (1.89)        | 551 (2.24)        | 799 (3.24)        | 2573 (10.45)      | <0.01        |
| Dyslipidemia, n (%)            | 4648(4.72)     | 953 (3.87)        | 1090 (4.42)       | 1228 (4.98)       | 1377 (5.59)       | <0.01        |
| CKD, eGFR <60 mL/min, n (%)    | 8359 (8.48)    | 1987 (8.07)       | 1842 (7.48)       | 2067 (8.38)       | 2463 (10.00)      | <0.01        |
| Medications                    |                |                   |                   |                   |                   |              |
| Antihypertensive agents, n (%) | 14392 (14.60)  | 3013 (12.23)      | 3292 (13.36)      | 3625 (14.70)      | 4462 (18.12)      | <0.01        |
| Hypoglycemic agents, n (%)     | 3805 (3.86)    | 399 (1.62)        | 463 (1.88)        | 689 (2.79)        | 2254 (9.15)       | <0.01        |
| Lipid-lowers agents, n (%)     | 969 (0.98)     | 162 (0.66)        | 199 (0.81)        | 254 (1.03)        | 354 (1.44)        | <0.01        |
| Lifestyle                      |                |                   |                   |                   |                   |              |
| Current smoker, n (%)          | 33595 (34.09)  | 8270 (33.57)      | 8229 (33.41)      | 8565 (34.74)      | 8531 (34.64)      | <0.01        |
| Current alcohol use, n (%)     | 34799 (35.31)  | 8877 (36.03)      | 8643 (35.09)      | 8819 (35.77)      | 8460 (34.35)      | <0.01        |
| Regular exercise, n (%)        | 69113 (70.13)  | 17576 (71.35)     | 17255 (70.05)     | 17180 (69.68)     | 17102 (69.44)     | <0.01        |
| Low-income level, n (%)        | 51514 (52.27)  | 13337 (54.14)     | 12655 (51.37)     | 12610 (51.14)     | 12912 (52.43)     | <0.01        |

|                                |                  |                  |                  |                  |                  |       |
|--------------------------------|------------------|------------------|------------------|------------------|------------------|-------|
| Health examination             |                  |                  |                  |                  |                  |       |
| Body weight, kg                | 71.13±11.28      | 70.78±11.26      | 70.94±11.33      | 71.07±11.23      | 71.74±11.30      | <0.01 |
| BMI, kg/m <sup>2</sup>         | 25.08±3.40       | 24.92±3.36       | 25.00±3.35       | 25.05±3.39       | 25.36±3.47       | <0.01 |
| RHR, bpm                       | 73.64±10.49      | 73.13±10.07      | 73.16±10.12      | 73.48±10.42      | 74.77±11.22      | <0.01 |
| SBP, mmHg                      | 132.01±20.13     | 130.39±20.13     | 130.62±19.72     | 132.16±19.99     | 134.86±20.35     | <0.01 |
| DBP, mmHg                      | 84.71±11.16      | 84.18±11.14      | 84.26±11.10      | 84.79±11.21      | 85.62±11.15      | <0.01 |
| FPG, mmol/L                    | 5.69±1.85        | 5.34±0.97        | 5.39±1.03        | 5.55±1.27        | 6.48±3.05        | <0.01 |
| TC, mmol/L                     | 5.01±1.38        | 4.95±1.19        | 4.98±1.25        | 5.02±1.64        | 5.08±1.38        | <0.01 |
| *TG, mmol/L                    | 1.29 (0.92,1.92) | 1.25 (0.88,1.84) | 1.25 (0.90,1.86) | 1.29 (0.92,1.90) | 1.37 (0.99,2.06) | <0.01 |
| LDL-C, mmol/L                  | 2.62±1.07        | 2.62±0.91        | 2.64±1.17        | 2.62±1.10        | 2.59±1.09        | <0.01 |
| HDL-C, mmol/L                  | 1.54±0.53        | 1.53±0.51        | 1.54±0.51        | 1.55±0.52        | 1.55±0.58        | <0.01 |
| Cr, μmol/L                     | 82.56±28.18      | 82.14±23.77      | 81.81±26.80      | 82.54±27.74      | 83.76±33.50      | <0.01 |
| eGFR, mL/min                   | 88.79±20.75      | 89.68±21.24      | 89.70±19.70      | 88.70±20.39      | 87.06±21.50      | <0.01 |
| *Hs-CRP, mg/L                  | 1.20 (0.54,2.77) | 1.18 (0.55,2.68) | 1.10 (0.50,2.60) | 1.16 (0.56,2.70) | 1.30 (0.59,3.10) | <0.01 |
| The number of FBP measurements |                  |                  |                  |                  |                  | <0.01 |
| 2                              | 41965 (42.58)    | 13609 (55.24)    | 8968 (36.40)     | 8858 (35.93)     | 10530 (42.75)    |       |
| 3                              | 56589 (57.42)    | 11026 (44.76)    | 15666 (63.60)    | 15798 (64.07)    | 14099 (57.25)    |       |
| FBP Variability                |                  |                  |                  |                  |                  |       |
| *SD                            | 0.43 (0.24,0.71) | 0.14 (0.08,0.19) | 0.33 (0.28,0.38) | 0.54 (0.47,0.62) | 1.01 (0.81,1.52) | <0.01 |
| *ARV                           | 0.54 (0.30,0.94) | 0.18 (0.10,0.25) | 0.42 (0.35,0.52) | 0.70 (0.57,0.86) | 1.35 (1.04,2.00) | <0.01 |

|      |                  |                  |                  |                  |                  |       |
|------|------------------|------------------|------------------|------------------|------------------|-------|
| *VIM | 0.43 (0.24,0.71) | 0.14 (0.08,0.19) | 0.33 (0.28,0.38) | 0.54 (0.47,0.62) | 1.01 (0.81,1.52) | <0.01 |
|------|------------------|------------------|------------------|------------------|------------------|-------|

Note: Q1, the coefficient of variability of FPG < 4.56 mmol/L; Q2, 4.56 mmol/L ≤ the coefficient of variability of FPG < 8.14 mmol/L; Q3, 8.14 mmol/L ≤ the coefficient of variability of FPG < 13.20 mmol/L; Q4, the coefficient of variability of FPG ≥ 13.20 mmol/L.

Low-income level: income ≥ 800 Renminbi/month.

Continuous variables are presented as mean ± SD, and categorical variables are presented as percentage.

Abbreviations: CKD, chronic kidney disease; eGFR, estimated glomerular filtration rate; Scr, serum creatinine levels; BMI, body mass index; DBP, diastolic blood pressure; SBP, systolic blood pressure; FBG, fasting blood glucose; HDL-C, high-density lipoprotein cholesterol; LDL-C, low-density lipoprotein cholesterol; RHR, resting heart rate; TC, total cholesterol; TG, triglyceride; Hs-CRP, High-sensitivity C-reactive protein; VIM, variability independent of mean; SD, the standard deviation; ARV, average real variability.

\*Triglyceride levels, Hs-CRP levels, the SD of fasting plasma glucose levels, the variability independent of the mean and the average real variability the coefficient of variability are presented as median (interquartile range).

**Table S4. Baseline Characteristics Grouped by Standard Deviation of Fasting Plasma Glucose Levels**

| <b>Variables</b>               | <b>Total</b>   | <b>Quartile 1</b> | <b>Quartile 2</b> | <b>Quartile 3</b> | <b>Quartile 4</b> | <b>P</b>     |
|--------------------------------|----------------|-------------------|-------------------|-------------------|-------------------|--------------|
|                                | <b>N=98554</b> | <b>N=24801</b>    | <b>N=24768</b>    | <b>N=24362</b>    | <b>N=24623</b>    | <b>value</b> |
| Age, y                         | 53.63±12.34    | 51.97±12.45       | 52.52±12.41       | 53.85±12.38       | 56.18±11.65       | <0.01        |
| Male sex, n (%)                | 77688 (78.83)  | 19122 (77.10)     | 19031 (76.84)     | 19387 (79.58)     | 20148 (81.83)     | <0.01        |
| <b>Comorbidities</b>           |                |                   |                   |                   |                   |              |
| Hypertension, n (%)            | 15490 (15.72)  | 3204 (12.92)      | 3441 (13.89)      | 3819 (15.68)      | 5026 (20.41)      | <0.01        |
| Diabetes mellitus, n (%)       | 4388 (4.45)    | 327 (1.32)        | 331 (1.34)        | 533 (2.19)        | 3197 (12.98)      | <0.01        |
| Dyslipidemia, n (%)            | 4648(4.72)     | 933(3.76)         | 1031(4.16)        | 1183(4.86)        | 1501(6.01)        | <0.01        |
| CKD, eGFR <60 mL/min, n (%)    | 8359 (8.48)    | 1977 (7.97)       | 1899 (7.67)       | 1973 (8.10)       | 2510 (10.19)      | <0.01        |
| <b>Medications</b>             |                |                   |                   |                   |                   |              |
| Antihypertensive agents, n (%) | 14392 (14.60)  | 2908 (11.73)      | 3177 (12.83)      | 3561 (14.62)      | 4746 (19.27)      | <0.01        |
| Hypoglycemic agents, n (%)     | 3805 (3.86)    | 273 (1.10)        | 270 (1.09)        | 459 (1.88)        | 2803 (11.38)      | <0.01        |
| Lipid-lowers agents, n (%)     | 969 (0.98)     | 153 (0.62)        | 199 (0.80)        | 235 (0.96)        | 382 (1.55)        | <0.01        |
| <b>Lifestyle</b>               |                |                   |                   |                   |                   |              |
| Current smoker, n (%)          | 33595 (34.09)  | 8313 (33.52)      | 8163 (32.96)      | 8551 (35.10)      | 8568 (34.80)      | <0.01        |
| Current alcohol use, n (%)     | 34799 (35.31)  | 8848 (35.68)      | 8577 (34.63)      | 8838 (36.28)      | 8536 (34.67)      | <0.01        |
| Regular exercise, n (%)        | 69113 (70.13)  | 17689 (71.32)     | 17353 (70.06)     | 16942 (69.54)     | 17129 (69.57)     | <0.01        |
| Low-income level, n (%)        | 51514 (52.27)  | 13452 (54.24)     | 12773 (51.57)     | 12432 (51.03)     | 12857 (52.22)     | <0.01        |

|                                |                    |                   |                   |                   |                    |       |
|--------------------------------|--------------------|-------------------|-------------------|-------------------|--------------------|-------|
| Health examination             |                    |                   |                   |                   |                    |       |
| Body weight, kg                | 71.13±11.28        | 70.51±11.29       | 70.78±11.32       | 71.06±11.18       | 72.18±11.27        | <0.01 |
| BMI, kg/m <sup>2</sup>         | 25.08±3.40         | 24.84±3.36        | 24.96±3.35        | 25.04±3.37        | 25.49±3.47         | <0.01 |
| RHR, bpm                       | 73.64±10.49        | 72.97±9.99        | 72.92±10.06       | 73.44±10.40       | 75.23±11.30        | <0.01 |
| SBP, mmHg                      | 132.01±20.13       | 129.76±20.02      | 130.09±19.56      | 132.25±19.93      | 135.96±20.39       | <0.01 |
| DBP, mmHg                      | 84.71±11.16        | 83.93±11.14       | 83.99±11.05       | 84.87±11.16       | 86.06±11.17        | <0.01 |
| FPG, mmol/L                    | 5.69±1.85          | 5.22±0.74         | 5.27±0.77         | 5.45±0.93         | 6.83±3.16          | <0.01 |
| TC, mmol/L                     | 5.01±1.38          | 4.93±1.12         | 4.96±1.37         | 5.02±1.58         | 5.12±1.39          | <0.01 |
| *TG, mmol/L                    | 1.29 (0.92, 1.92)  | 1.23 (0.87, 1.81) | 1.24 (0.89, 1.83) | 1.30 (0.92, 1.89) | 1.40 (1.01, 2.13)  | <0.01 |
| LDL-C, mmol/L                  | 2.62±1.07          | 2.61±0.91         | 2.62±1.07         | 2.62±1.20         | 2.63±1.09          | 0.07  |
| HDL-C, mmol/L                  | 1.54±0.53          | 1.53±0.52         | 1.54±0.50         | 1.55±0.51         | 1.54±0.58          | <0.01 |
| Cr, µmol/L                     | 82.56±28.18        | 82.03±23.85       | 81.85±27.42       | 82.41±26.47       | 83.96±33.97        | <0.01 |
| eGFR, mL/min                   | 88.79±20.75        | 89.83±21.29       | 89.68±19.81       | 88.75±19.98       | 86.87±21.70        | <0.01 |
| *Hs-CRP                        | 1.20 (0.54, 2.77)  | 1.13 (0.53, 2.62) | 1.10 (0.50, 2.60) | 1.14 (0.54, 2.70) | 1.30 (0.60, 3.10)  | <0.01 |
| The number of FBP measurements |                    |                   |                   |                   |                    | <0.01 |
| 2                              | 41965 (42.58)      | 13554 (54.65)     | 9029 (36.45)      | 8825 (36.22)      | 10557 (42.87)      |       |
| 3                              | 56589 (57.42)      | 11247 (45.35)     | 15739 (63.55)     | 15537 (63.78)     | 14066 (57.13)      |       |
| FBP Variability                |                    |                   |                   |                   |                    |       |
| *CV                            | 8.14 (4.56, 13.20) | 2.69(1.50, 3.70)  | 6.39(5.48, 7.40)  | 10.44(9.16,11.92) | 18.25(15.13,24.05) | <0.01 |
| *VIM                           | 0.43 (0.24, 0.71)  | 0.14 (0.08, 0.19) | 0.33 (0.28, 0.38) | 0.55 (0.49, 0.62) | 1.04 (0.84, 1.53)  | <0.01 |

|      |                   |                   |                   |                   |                   |       |
|------|-------------------|-------------------|-------------------|-------------------|-------------------|-------|
| *ARV | 0.54 (0.30, 0.94) | 0.18 (0.10, 0.25) | 0.42 (0.35, 0.52) | 0.71 (0.59, 0.85) | 1.39 (1.09, 2.02) | <0.01 |
|------|-------------------|-------------------|-------------------|-------------------|-------------------|-------|

Note: Q1, standard deviation of FBG < 0.24; Q2, 0.24 ≤ standard deviation of FBG < 0.43; Q3, 0.43 ≤ standard deviation of FBG < 0.77; Q4, standard deviation of FBG ≥ 0.77.

Low-income level: income ≥ 800 Renminbi/month.

Continuous variables are presented as mean ± SD, and categorical variables are presented as percentage.

Abbreviations: CKD, chronic kidney disease; eGFR, estimated glomerular filtration rate; Scr, serum creatinine levels; BMI, body mass index; DBP, diastolic blood pressure; SBP, systolic blood pressure; FBG, fasting blood glucose; HDL-C, high-density lipoprotein cholesterol; LDL-C, low-density lipoprotein cholesterol; RHR, resting heart rate; TC, total cholesterol; TG, triglyceride; Hs-CRP, High-sensitivity C-reactive protein; CV, coefficient of variance; VIM, variability independent of mean; ARV, average real variability.

\*Triglyceride levels, Hs-CRP levels, the standard deviation of fasting plasma glucose levels, the variability independent of the mean and the average real variability the coefficient of variability are presented as median (interquartile range).

**Table S5. Subgroup Analyses (Impact of the Average Real Variability of Fasting Plasma Glucose Levels)**

| <b>Variables</b> | <b>Group</b> | <b>Patients,<br/>n</b> | <b>Events,<br/>case, n (%)</b> | <b>IR*</b> | <b>Model 1<br/>HR (95%CI)</b> | <b>P value</b> | <b>Model 2<br/>HR (95%CI)</b> | <b>P value</b> | <b>Model 3<br/>HR (95%CI)</b> | <b>P value</b> |
|------------------|--------------|------------------------|--------------------------------|------------|-------------------------------|----------------|-------------------------------|----------------|-------------------------------|----------------|
| <b>Age</b>       |              |                        |                                |            |                               | 0.0390†        |                               | 0.0453†        |                               | 0.0471†        |
| <65 y            | Q1           | 21460                  | 118 (0.55)                     | 0.87       | 1(reference)                  |                | 1(reference)                  |                | 1(reference)                  |                |
|                  | Q2           | 20715                  | 115 (0.56)                     | 0.89       | 0.991(0.767-1.282)            | 0.9470         | 0.971(0.751-1.255)            | 0.8206         | 0.974(0.753-1.259)            | 0.8408         |
|                  | Q3           | 21587                  | 143 (0.66)                     | 1.11       | 1.150(0.901-1.468)            | 0.2609         | 1.086(0.851-1.387)            | 0.5073         | 1.067(0.836-1.363)            | 0.6018         |
|                  | Q4           | 19351                  | 240 (1.24)                     | 0.95       | 1.868(1.497-2.330)            | <0.0001        | 1.411(1.118-1.780)            | 0.0038         | 1.356(1.074-1.712)            | 0.0104         |
| ≥65 y            | Q1           | 3347                   | 102 (3.05)                     | 2.89       | 1(reference)                  |                | 1(reference)                  |                | 1(reference)                  |                |
|                  | Q2           | 3574                   | 119 (3.33)                     | 5.47       | 1.125(0.864-1.466)            | 0.3819         | 1.122(0.861-1.462)            | 0.3924         | 1.118(0.858-1.458)            | 0.4075         |
|                  | Q3           | 4381                   | 159 (3.63)                     | 5.92       | 1.241(0.968-1.592)            | 0.0885         | 1.217(0.948-1.561)            | 0.1229         | 1.209(0.942-1.551)            | 0.1363         |
|                  | Q4           | 5139                   | 222 (4.32)                     | 6.91       | 1.466(1.159-1.853)            | 0.0014         | 1.297(1.015-1.658)            | 0.0376         | 1.276(0.998-1.633)            | 0.0521         |
| <b>Sex</b>       |              |                        |                                |            |                               | 0.3353†        |                               | 0.4998†        |                               | 0.5844†        |
| Male             | Q1           | 19037                  | 188 (0.99)                     | 1.56       | 1(reference)                  |                | 1(reference)                  |                | 1(reference)                  |                |
|                  | Q2           | 18766                  | 200 (1.07)                     | 1.71       | 1.061(0.869-1.294)            | 0.5615         | 1.048(0.859-1.279)            | 0.6428         | 1.050(0.860-1.281)            | 0.6330         |
|                  | Q3           | 19858                  | 264 (1.33)                     | 2.12       | 1.233(1.023-1.487)            | 0.0280         | 1.187(0.984-1.431)            | 0.0735         | 1.175(0.974-1.418)            | 0.0912         |
|                  | Q4           | 20027                  | 388 (1.94)                     | 3.04       | 1.629(1.368-1.939)            | <0.0001        | 1.359(1.133-1.630)            | 0.0010         | 1.325(1.104-1.590)            | 0.0025         |
| Female           | Q1           | 5770                   | 32 (0.55)                      | 0.90       | 1(reference)                  |                | 1(reference)                  |                | 1(reference)                  |                |
|                  | Q2           | 5523                   | 34 (0.62)                      | 1.01       | 1.063(0.656-1.722)            | 0.8051         | 1.077(0.664-1.748)            | 0.7628         | 1.063(0.655-1.726)            | 0.8034         |

|                          |    |       |            |      |                    |         |                    |         |                    |         |
|--------------------------|----|-------|------------|------|--------------------|---------|--------------------|---------|--------------------|---------|
|                          | Q3 | 5110  | 38 (0.74)  | 1.21 | 1.092(0.682-1.749) | 0.7127  | 1.040(0.649-1.667) | 0.8711  | 1.005(0.627-1.613) | 0.9821  |
|                          | Q4 | 4463  | 74 (1.66)  | 2.67 | 2.023(1.335-3.067) | 0.0009  | 1.401(0.898-2.187) | 0.1376  | 1.314(0.840-2.056) | 0.2317  |
| <b>Hypertension</b>      |    |       |            |      |                    | 0.3615† |                    | 0.2669† |                    | 0.2186† |
| Yes                      | Q1 | 3218  | 56 (1.74)  | 2.78 | 1(reference)       |         | 1(reference)       |         | 1(reference)       |         |
|                          | Q2 | 3406  | 75 (2.20)  | 3.58 | 1.271(0.899-1.796) | 0.1752  | 1.281(0.906-1.812) | 0.1615  | 1.299(0.919-1.838) | 0.1388  |
|                          | Q3 | 3923  | 104 (2.56) | 4.30 | 1.483(1.072-2.053) | 0.0174  | 1.465(1.058-2.030) | 0.0215  | 1.469(1.061-2.036) | 0.0206  |
|                          | Q4 | 4943  | 167 (3.38) | 5.39 | 1.781(1.316-2.411) | 0.0002  | 1.510(1.095-2.082) | 0.0119  | 1.497(1.085-2.065) | 0.0141  |
| No                       | Q1 | 21589 | 164 (0.76) | 1.21 | 1(reference)       |         | 1(reference)       |         | 1(reference)       |         |
|                          | Q2 | 20883 | 159 (0.76) | 1.23 | 0.977(0.786-1.215) | 0.8355  | 0.980(0.788-1.219) | 0.8586  | 0.968(0.778-1.205) | 0.7724  |
|                          | Q3 | 21045 | 198 (0.94) | 1.50 | 1.090(0.886-1.340) | 0.4163  | 1.071(0.870-1.318) | 0.5177  | 1.048(0.851-1.289) | 0.6604  |
|                          | Q4 | 19547 | 295 (1.51) | 2.37 | 1.554(1.284-1.882) | <0.0001 | 1.332(1.092-1.624) | 0.0047  | 1.277(1.047-1.558) | 0.0160  |
| <b>Diabetes mellitus</b> |    |       |            |      |                    | 0.5875† |                    | 0.6273† |                    | 0.5647† |
| Yes                      | Q1 | 315   | 5 (1.59)   | 2.53 | 1(reference)       |         | 1(reference)       |         | 1(reference)       |         |
|                          | Q2 | 355   | 11 (3.10)  | 5.01 | 2.038(0.708-5.867) | 0.1868  | 1.963(0.681-6.654) | 0.2116  | 2.008(0.696-5.789) | 0.1971  |
|                          | Q3 | 590   | 16 (2.71)  | 4.48 | 1.721(0.630-4.698) | 0.2893  | 1.635(0.598-4.467) | 0.3377  | 1.670(0.611-4.569) | 0.3176  |
|                          | Q4 | 3128  | 113 (3.61) | 5.92 | 2.350(0.959-5.756) | 0.0617  | 2.044(0.829-5.042) | 0.1206  | 2.022(0.819-4.991) | 0.1268  |
| No                       | Q1 | 24492 | 215 (0.88) | 1.39 | 1(reference)       |         | 1(reference)       |         | 1(reference)       |         |
|                          | Q2 | 23934 | 223 (0.93) | 1.50 | 1.036(0.859-1.249) | 0.7126  | 1.026(0.850-1.237) | 0.7908  | 1.020(0.845-1.230) | 0.8378  |
|                          | Q3 | 24378 | 286 (1.17) | 1.88 | 1.191(0.998-1.421) | 0.0532  | 1.153(0.966-1.377) | 0.1143  | 1.134(0.950-1.354) | 0.1616  |

|                       |    |       |            |      |                    |         |                    |         |                    |         |
|-----------------------|----|-------|------------|------|--------------------|---------|--------------------|---------|--------------------|---------|
|                       | Q4 | 21362 | 349 (1.63) | 2.56 | 1.498(1.264-1.776) | <0.0001 | 1.343(1.129-1.598) | 0.0009  | 1.294(1.087-1.540) | 0.0038  |
| <b>CKD</b>            |    |       |            |      |                    | 0.8165† |                    | 0.8317† |                    | 0.8413† |
| Yes                   | Q1 | 1869  | 39 (2.09)  | 3.21 | 1(reference)       |         | 1(reference)       |         | 1(reference)       |         |
|                       | Q2 | 1898  | 44 (2.32)  | 3.65 | 1.120(0.728-1.724) | 0.6060  | 1.091(0.708-1.680) | 0.6934  | 1.083(0.703-1.668) | 0.7717  |
|                       | Q3 | 2030  | 61 (3.00)  | 4.70 | 1.425(0.953-2.130) | 0.0841  | 1.360(0.909-2.035) | 0.1343  | 1.346(0.899-2.014) | 0.1489  |
|                       | Q4 | 2562  | 95 (3.71)  | 5.71 | 1.735(1.195-2.520) | 0.0038  | 1.450(0.975-2.156) | 0.0665  | 1.432(0.962-2.132) | 0.0773  |
| No                    | Q1 | 22938 | 181 (0.79) | 1.26 | 1(reference)       |         | 1(reference)       |         | 1(reference)       |         |
|                       | Q2 | 22391 | 190 (0.85) | 1.37 | 1.046(0.853-1.282) | 0.6646  | 1.036(0.845-1.270) | 0.7315  | 1.034(0.843-1.267) | 0.7487  |
|                       | Q3 | 22938 | 241 (1.05) | 1.69 | 1.172(0.966-1.421) | 0.1068  | 1.128(0.930-1.368) | 0.2214  | 1.111(0.916-1.348) | 0.2851  |
|                       | Q4 | 21928 | 367 (1.67) | 2.64 | 1.660(1.389-1.985) | <0.0001 | 1.352(1.122-1.629) | 0.0015  | 1.309(1.086-1.577) | 0.0048  |
| <b>BMI</b>            |    |       |            |      |                    | 0.3063† |                    | 0.2339† |                    | 0.2108† |
| <25 kg/m <sup>2</sup> | Q1 | 13505 | 97 (0.72)  | 1.14 | 1(reference)       |         | 1(reference)       |         | 1(reference)       |         |
|                       | Q2 | 12744 | 104 (0.82) | 1.31 | 1.129(0.856-1.488) | 0.3915  | 1.114(0.845-1.469) | 0.4442  | 1.126(0.853-1.485) | 0.4023  |
|                       | Q3 | 12871 | 131 (1.02) | 1.62 | 1.260(0.969-1.638) | 0.0849  | 1.230(0.946-1.599) | 0.1230  | 1.230(0.946-1.600) | 0.1227  |
|                       | Q4 | 11580 | 203 (1.75) | 2.75 | 1.924(1.510-2.452) | <0.0001 | 1.537(1.192-1.982) | 0.0009  | 1.536(1.191-1.981) | 0.0009  |
| ≥25 kg/m <sup>2</sup> | Q1 | 11302 | 123 (1.09) | 1.74 | 1(reference)       |         | 1(reference)       |         | 1(reference)       |         |
|                       | Q2 | 11545 | 130 (1.13) | 1.82 | 0.991(0.775-1.269) | 0.9454  | 0.987(0.771-1.263) | 0.9150  | 0.769(0.769-1.259) | 0.8985  |
|                       | Q3 | 12097 | 171 (1.41) | 2.27 | 1.156(0.917-1.457) | 0.2213  | 1.108(0.878-1.397) | 0.3875  | 1.867(0.867-1.380) | 0.4477  |
|                       | Q4 | 12910 | 259 (2.01) | 3.18 | 1.456(1.174-1.805) | 0.0006  | 1.215(0.970-1.522) | 0.0894  | 1.938(0.938-1.472) | 0.1601  |

\*IR (incidence rate) presented as per 1000 person-years

†P for interaction

Model 1, adjusted for age and sex

Model 2, Model 1 + RHR, LDL-C, HDL-C, baseline FPG, hypotensive drugs, hypoglycemic drugs, hypertension and diabetes mellitus

Model 3, Model 2 + SBP, DBP, BMI, Hs-CRP, smoking status, drinking status, and physical exercise

Abbreviations: CI, confidence interval; HR, hazard ratio; RHR, resting heart rate; DBP, diastolic blood pressure; SBP, systolic blood pressure; LDL-C, low-density lipoprotein cholesterol; HDL-C, high-density lipoprotein cholesterol; BMI, body mass index; Hs-CRP, High-sensitivity C-reactive protein; FPG, fasting plasma glucose.

**Table S6. Subgroup Analyses (Impact of the Variability Independent of the Mean of Fasting Plasma Glucose Levels Q4)**

| <b>Variables</b> | <b>Group</b> | <b>Patients,<br/>n</b> | <b>Events,<br/>case, n (%)</b> | <b>IR*</b> | <b>Model 1<br/>HR (95%CI)</b> | <b>P value</b> | <b>Model 2<br/>HR (95%CI)</b> | <b>P value</b> | <b>Model 3<br/>HR (95%CI)</b> | <b>P value</b> |
|------------------|--------------|------------------------|--------------------------------|------------|-------------------------------|----------------|-------------------------------|----------------|-------------------------------|----------------|
| <b>Age</b>       |              |                        |                                |            |                               | 0.0899†        |                               | 0.1007†        |                               | 0.1037†        |
| <65 y            | Q1           | 21466                  | 120(0.55)                      | 0.88       | 1(reference)                  |                | 1(reference)                  |                | 1(reference)                  |                |
|                  | Q2           | 21094                  | 124(0.56)                      | 0.94       | 1.047(0.814-1.346)            | 0.7211         | 1.033(0.803-1.327)            | 0.8018         | 1.036(0.806-1.332)            | 0.7838         |
|                  | Q3           | 22556                  | 157(0.66)                      | 1.11       | 1.149(0.905-1.457)            | 0.2539         | 1.089(0.858-1.382)            | 0.4833         | 1.073(0.846-1.363)            | 0.5605         |
|                  | Q4           | 16997                  | 215(1.24)                      | 2.00       | 1.854(1.482-2.320)            | <.0001         | 1.354(1.067-1.719)            | 0.0126         | 1.298(1.023-1.648)            | 0.0321         |
| ≥65 y            | Q1           | 3343                   | 104(3.05)                      | 4.95       | 1(reference)                  |                | 1(reference)                  |                | 1(reference)                  |                |
|                  | Q2           | 3669                   | 115(3.33)                      | 5.11       | 1.036(0.795-1.351)            | 0.7931         | 1.032(0.791-1.345)            | 0.8168         | 1.030(0.790-1.343)            | 0.8266         |
|                  | Q3           | 4778                   | 181(3.63)                      | 6.20       | 1.266(0.995-1.612)            | 0.0552         | 1.248(0.980-1.590)            | 0.072          | 1.241(0.974-1.581)            | 0.0805         |
|                  | Q4           | 4651                   | 202(4.32)                      | 6.99       | 1.458(1.151-1.848)            | 0.0018         | 1.276(0.993-1.638)            | 0.0564         | 1.251(0.973-1.607)            | 0.0807         |
| <b>Sex</b>       |              |                        |                                |            |                               | 0.0624†        |                               | 0.1252†        |                               | 0.1904†        |
| Male             | Q1           | 19130                  | 192(0.99)                      | 1.57       | 1(reference)                  |                | 1(reference)                  |                | 1(reference)                  |                |
|                  | Q2           | 19026                  | 204(1.07)                      | 1.71       | 1.054(0.865-1.283)            | 0.6034         | 1.042(0.856-1.269)            | 0.6801         | 1.043(0.856-1.270)            | 0.6777         |
|                  | Q3           | 21762                  | 298(1.33)                      | 2.19       | 1.266(1.056-1.518)            | 0.0108         | 1.225(1.022-1.469)            | 0.0284         | 1.212(1.011-1.454)            | 0.0379         |
|                  | Q4           | 17770                  | 346(1.94)                      | 3.07       | 1.603(1.343-1.913)            | <.0001         | 1.308(1.087-1.576)            | 0.0046         | 1.272(1.056-1.533)            | 0.0113         |
| Female           | Q1           | 5679                   | 32(0.55)                       | 0.91       | 1(reference)                  |                | 1(reference)                  |                | 1(reference)                  |                |
|                  | Q2           | 5737                   | 35(0.62)                       | 1.00       | 1.015(0.629-1.640)            | 0.951          | 1.027(0.635-1.661)            | 0.9121         | 1.024(0.633-1.656)            | 0.924          |

|                          |    |       |           |      |                    |         |                    |         |                    |         |
|--------------------------|----|-------|-----------|------|--------------------|---------|--------------------|---------|--------------------|---------|
|                          | Q3 | 5572  | 40(0.74)  | 1.18 | 0.982(0.616-1.564) | 0.9378  | 0.930(0.583-1.484) | 0.7608  | 0.912(0.571-1.455) | 0.6979  |
|                          | Q4 | 3878  | 71(1.66)  | 2.96 | 2.132(1.403-3.241) | 0.0004  | 1.456(0.926-2.287) | 0.1036  | 1.342(0.851-2.117) | 0.2058  |
| <b>Hypertension</b>      |    |       |           |      |                    | 0.1657† |                    | 0.1213† |                    | 0.1350† |
| Yes                      | Q1 | 3204  | 62(1.74)  | 3.06 | 1(reference)       |         | 1(reference)       |         | 1(reference)       |         |
|                          | Q2 | 3444  | 65(2.20)  | 3.06 | 0.956(0.675-1.353) | 0.7979  | 0.968(0.683-1.371) | 0.8534  | 0.975(0.688-1.381) | 0.8851  |
|                          | Q3 | 4313  | 123(2.65) | 4.63 | 1.428(1.052-1.938) | 0.0223  | 1.421(1.046-1.932) | 0.0248  | 1.416(1.042-1.925) | 0.0263  |
|                          | Q4 | 4529  | 152(3.38) | 5.38 | 1.587(1.181-2.133) | 0.0022  | 1.329(0.967-1.825) | 0.0793  | 1.317(0.958-1.810) | 0.0904  |
| No                       | Q1 | 21605 | 162(0.76) | 1.18 | 1(reference)       |         | 1(reference)       |         | 1(reference)       |         |
|                          | Q2 | 21319 | 174(0.76) | 1.31 | 1.075(0.868-1.332) | 0.5077  | 1.085(0.876-1.344) | 0.4543  | 1.075(0.868-1.332) | 0.5054  |
|                          | Q3 | 23021 | 215(0.94) | 1.50 | 1.109(0.904-1.360) | 0.3198  | 1.105(0.901-1.355) | 0.3393  | 1.083(0.883-1.329) | 0.4448  |
|                          | Q4 | 17119 | 265(1.51) | 2.44 | 1.603(1.318-1.949) | <0.0001 | 1.356(1.105-1.664) | 0.0036  | 1.289(1.050-1.583) | 0.0152  |
| <b>Diabetes mellitus</b> |    |       |           |      |                    | 0.4489† |                    | 0.4114† |                    | 0.4018† |
| Yes                      | Q1 | 329   | 5(1.59)   | 2.40 | 1(reference)       |         | 1(reference)       |         | 1(reference)       |         |
|                          | Q2 | 330   | 12(3.10)  | 5.85 | 2.343(0.826-6.650) | 0.1097  | 2.312(0.814-6.566) | 0.1154  | 2.380(0.837-6.763) | 0.1037  |
|                          | Q3 | 641   | 22(2.71)  | 5.64 | 2.228(0.844-5.884) | 0.106   | 2.149(0.813-5.681) | 0.1228  | 2.126(0.804-5.624) | 0.1285  |
|                          | Q4 | 3088  | 106(3.61) | 5.63 | 2.295(0.936-5.628) | 0.0696  | 2.004(0.811-4.948) | 0.1319  | 1.982(0.802-4.901) | 0.1384  |
| No                       | Q1 | 24480 | 219(0.88) | 1.41 | 1(reference)       |         | 1(reference)       |         | 1(reference)       |         |
|                          | Q2 | 24433 | 227(0.93) | 1.49 | 1.021(0.848-1.229) | 0.8295  | 1.010(0.839-1.217) | 0.9137  | 1.007(0.837-1.213) | 0.9391  |
|                          | Q3 | 26693 | 316(1.17) | 1.90 | 1.190(1.001-1.413) | 0.0484  | 1.158(0.975-1.377) | 0.0951  | 1.142(0.961-1.357) | 0.1321  |

|                       |    |       |           |      |                    |         |                    |         |                    |         |
|-----------------------|----|-------|-----------|------|--------------------|---------|--------------------|---------|--------------------|---------|
|                       | Q4 | 18560 | 311(1.63) | 2.64 | 1.496(1.258-1.779) | <.0001  | 1.321(1.106-1.578) | 0.0021  | 1.267(1.060-1.515) | 0.0092  |
| <b>CKD</b>            |    |       |           |      |                    | 0.7092† |                    | 0.7087† |                    | 0.6783† |
| Yes                   | Q1 | 1977  | 39(2.09)  | 3.00 | 1(reference)       |         | 1(reference)       |         | 1(reference)       |         |
|                       | Q2 | 1898  | 49(2.32)  | 4.05 | 1.301(0.854-1.981) | 0.2204  | 1.297(0.851-1.975) | 0.226   | 1.292(0.848-1.968) | 0.2328  |
|                       | Q3 | 2221  | 61(3.00)  | 4.30 | 1.377(0.921-2.059) | 0.1185  | 1.334(0.892-1.996) | 0.161   | 1.318(0.880-1.973) | 0.1801  |
|                       | Q4 | 2263  | 90(3.71)  | 6.18 | 1.969(1.352-2.867) | 0.0004  | 1.678(1.120-2.513) | 0.012   | 1.641(1.094-2.460) | 0.0165  |
| No                    | Q1 | 22832 | 185(0.79) | 1.28 | 1(reference)       |         | 1(reference)       |         | 1(reference)       |         |
|                       | Q2 | 22865 | 190(0.85) | 1.34 | 1.000(0.817-1.224) | 0.9984  | 0.990(0.809-1.213) | 0.9244  | 0.986(0.805-1.208) | 0.893   |
|                       | Q3 | 25113 | 277(1.05) | 1.77 | 1.203(0.998-1.449) | 0.0523  | 1.158(0.961-1.395) | 0.1238  | 1.143(0.948-1.377) | 0.1609  |
|                       | Q4 | 19385 | 327(1.67) | 2.68 | 1.608(1.342-1.926) | <0.0001 | 1.271(1.051-1.538) | 0.0136  | 1.223(1.011-1.481) | 0.0386  |
| <b>BMI</b>            |    |       |           |      |                    | 0.4249† |                    | 0.3302† |                    | 0.3172† |
| <25 kg/m <sup>2</sup> | Q1 | 13529 | 100(0.72) | 1.61 | 1(reference)       |         | 1(reference)       |         | 1(reference)       |         |
|                       | Q2 | 13088 | 108(0.82) | 1.32 | 1.115(0.849-1.464) | 0.4331  | 1.097(0.835-1.440) | 0.5063  | 1.101(0.838-1.445) | 0.4905  |
|                       | Q3 | 14067 | 148(1.02) | 1.69 | 1.287(0.998-1.659) | 0.0515  | 1.254(0.972-1.616) | 0.0812  | 1.259(0.976-1.623) | 0.0762  |
|                       | Q4 | 10016 | 179(1.75) | 2.81 | 1.889(1.479-2.414) | <0.0001 | 1.471(1.135-1.907) | 0.0036  | 1.467(1.131-1.902) | 0.0039  |
| ≥25 kg/m <sup>2</sup> | Q1 | 11280 | 124(1.09) | 1.74 | 1(reference)       |         | 1(reference)       |         | 1(reference)       |         |
|                       | Q2 | 11675 | 131(1.13) | 1.81 | 0.981(0.768-1.255) | 0.8813  | 0.982(0.768-1.256) | 0.8871  | 0.987(0.772-1.262) | 0.9153  |
|                       | Q3 | 13267 | 190(1.41) | 2.30 | 1.155(0.921-1.448) | 0.2137  | 1.114(0.888-1.398) | 0.3491  | 1.103(0.879-1.384) | 0.3963  |
|                       | Q4 | 11632 | 238(2.01) | 3.26 | 1.458(1.173-1.812) | 0.0007  | 1.198(0.953-1.506) | 0.1225  | 1.159(0.921-1.458) | 0.2086  |

\*IR (incidence rate) presented as per 1000 person-years

†P for interaction

Model 1, adjusted for age and sex

Model 2, Model 1 + RHR, LDL-C, HDL-C, baseline FPG, hypotensive drugs, hypoglycemic drugs, hypertension and diabetes mellitus

Model 3, Model 2 + SBP, DBP, BMI, Hs-CRP, smoking status, drinking status, and physical exercise

Abbreviations: CI, confidence interval; HR, hazard ratio; RHR, resting heart rate; DBP, diastolic blood pressure; SBP, systolic blood pressure; LDL-C, low-density lipoprotein cholesterol; HDL-C, high-density lipoprotein cholesterol; BMI, body mass index; Hs-CRP, High-sensitivity C-reactive protein; FPG, fasting plasma glucose.

**Table S7. Subgroup Analyses (Impact of the Coefficient of Variability of Fasting Plasma Glucose Levels Q4)**

| <b>Variables</b> | <b>Group</b> | <b>Patients,<br/>n</b> | <b>Events,<br/>case, n (%)</b> | <b>IR*</b> | <b>Model 1<br/>HR (95%CI)</b> | <b>P value</b> | <b>Model 2<br/>HR (95%CI)</b> | <b>P value</b> | <b>Model 3<br/>HR (95%CI)</b> | <b>P value</b> |
|------------------|--------------|------------------------|--------------------------------|------------|-------------------------------|----------------|-------------------------------|----------------|-------------------------------|----------------|
| <b>Age</b>       |              |                        |                                |            |                               | 0.3232†        |                               | 0.3292†        |                               | 0.3600†        |
| <65 y            | Q1           | 21260                  | 119(0.55)                      | 0.88       | 1(reference)                  |                | 1(reference)                  |                | 1(reference)                  |                |
|                  | Q2           | 20987                  | 143(0.56)                      | 1.09       | 1.221(0.958-1.558)            | 0.1069         | 1.196(0.937-1.525)            | 0.1504         | 1.201(0.942-1.533)            | 0.1399         |
|                  | Q3           | 20383                  | 147(0.66)                      | 1.15       | 1.220(0.958-1.554)            | 0.1067         | 1.155(0.907-1.472)            | 0.2433         | 1.144(0.898-1.458)            | 0.2773         |
|                  | Q4           | 19483                  | 207(1.24)                      | 1.68       | 1.632(1.302-2.046)            | <0.0001        | 1.291(1.023-1.630)            | 0.0315         | 1.256(0.995-1.586)            | 0.0556         |
| ≥65 y            | Q1           | 3375                   | 110(3.05)                      | 5.19       | 1(reference)                  |                | 1(reference)                  |                | 1(reference)                  |                |
|                  | Q2           | 3647                   | 112(3.33)                      | 5.02       | 0.965(0.742-1.255)            | 0.7903         | 0.957(0.735-1.245)            | 0.7415         | 0.960(0.738-1.249)            | 0.7600         |
|                  | Q3           | 4273                   | 164(3.63)                      | 6.29       | 1.216(0.955-1.549)            | 0.1126         | 1.201(0.942-1.529)            | 0.1388         | 1.196(0.939-1.524)            | 0.1471         |
|                  | Q4           | 5146                   | 216(4.32)                      | 6.76       | 1.334(1.060-1.678)            | 0.014          | 1.223(0.966-1.549)            | 0.0944         | 1.210(0.955-1.533)            | 0.1142         |
| <b>Sex</b>       |              |                        |                                |            |                               | 0.2122†        |                               | 0.2764†        |                               | 0.3270†        |
| Male             | Q1           | 19190                  | 196(0.99)                      | 1.60       | 1(reference)                  |                | 1(reference)                  |                | 1(reference)                  |                |
|                  | Q2           | 19053                  | 215(1.07)                      | 1.80       | 1.095(0.903-1.329)            | 0.3566         | 1.080(0.890-1.311)            | 0.4360         | 1.086(0.895-1.318)            | 0.4035         |
|                  | Q3           | 19553                  | 275(1.33)                      | 2.25       | 1.286(1.070-1.544)            | 0.0072         | 1.246(1.037-1.497)            | 0.0188         | 1.238(1.031-1.488)            | 0.0224         |
|                  | Q4           | 19892                  | 354(1.94)                      | 2.81       | 1.464(1.230-1.744)            | <0.0001        | 1.270(1.062-1.519)            | 0.0089         | 1.250(1.045-1.496)            | 0.0147         |
| Female           | Q1           | 5445                   | 33(0.55)                       | 0.98       | 1(reference)                  |                | 1(reference)                  |                | 1(reference)                  |                |
|                  | Q2           | 5581                   | 40(0.62)                       | 1.18       | 1.129(0.712-1.790)            | 0.6057         | 1.116(0.703-1.771)            | 0.6407         | 1.118(0.704-1.776)            | 0.6360         |

|                          |    |       |           |      |                    |         |                    |         |                    |         |
|--------------------------|----|-------|-----------|------|--------------------|---------|--------------------|---------|--------------------|---------|
|                          | Q3 | 5103  | 36(0.74)  | 1.16 | 0.948(0.591-1.522) | 0.8262  | 0.908(0.565-1.460) | 0.6897  | 0.886(0.551-1.426) | 0.6179  |
|                          | Q4 | 4737  | 69(1.66)  | 2.35 | 1.725(1.138-2.613) | 0.0101  | 1.272(0.823-1.967) | 0.2783  | 1.193(0.770-1.849) | 0.4295  |
| <b>Hypertension</b>      |    |       |           |      |                    | 0.6257† |                    | 0.5918† |                    | 0.6036† |
| Yes                      | Q1 | 3311  | 65(1.74)  | 3.11 | 1(reference)       |         | 1(reference)       |         | 1(reference)       |         |
|                          | Q2 | 3561  | 76(2.20)  | 3.47 | 1.071(0.769-1.491) | 0.6865  | 1.078(0.774-1.503) | 0.6564  | 1.095(0.786-1.526) | 0.592   |
|                          | Q3 | 3894  | 109(2.65) | 4.55 | 1.388(1.021-1.887) | 0.0365  | 1.369(1.006-1.863) | 0.0459  | 1.365(1.003-1.858) | 0.0481  |
|                          | Q4 | 4742  | 152(3.38) | 5.15 | 1.499(1.121-2.005) | 0.0063  | 1.323(0.978-1.789) | 0.0692  | 1.313(0.970-1.777) | 0.0779  |
| No                       | Q1 | 21324 | 164(0.76) | 1.21 | 1(reference)       |         | 1(reference)       |         | 1(reference)       |         |
|                          | Q2 | 21073 | 179(0.76) | 1.36 | 1.100(0.890-1.359) | 0.3799  | 1.110(0.898-1.372) | 0.3366  | 1.102(0.892-1.363) | 0.368   |
|                          | Q3 | 20762 | 202(0.94) | 1.56 | 1.147(0.934-1.410) | 0.1911  | 1.143(0.929-1.404) | 0.2060  | 1.126(0.916-1.385) | 0.2594  |
|                          | Q4 | 19905 | 271(1.51) | 2.15 | 1.425(1.173-1.731) | 0.0004  | 1.275(1.045-1.555) | 0.0165  | 1.237(1.014-1.509) | 0.0358  |
| <b>Diabetes mellitus</b> |    |       |           |      |                    | 0.6364† |                    | 0.6647† |                    | 0.6574† |
| Yes                      | Q1 | 465   | 10(1.59)  | 3.39 | 1(reference)       |         | 1(reference)       |         | 1(reference)       |         |
|                          | Q2 | 551   | 20(3.10)  | 5.93 | 1.675(0.784-3.579) | 0.1831  | 1.616(0.756-3.455) | 0.2155  | 1.667(0.779-3.569) | 0.1881  |
|                          | Q3 | 799   | 27(2.71)  | 5.55 | 1.551(0.750-3.205) | 0.2361  | 1.461(0.706-3.024) | 0.3072  | 1.455(0.702-3.016) | 0.3126  |
|                          | Q4 | 2573  | 88(3.61)  | 5.62 | 1.575(0.818-3.031) | 0.1739  | 1.440(0.746-2.780) | 0.2778  | 1.427(0.738-2.759) | 0.2906  |
| No                       | Q1 | 24170 | 219(0.88) | 1.43 | 1(reference)       |         | 1(reference)       |         | 1(reference)       |         |
|                          | Q2 | 24083 | 235(0.93) | 1.57 | 1.068(0.888-1.284) | 0.484   | 1.059(0.881-1.273) | 0.5448  | 1.060(0.882-1.274) | 0.5361  |
|                          | Q3 | 23857 | 284(1.17) | 1.91 | 1.203(1.008-1.435) | 0.0401  | 1.179(0.988-1.407) | 0.0673  | 1.168(0.979-1.393) | 0.0852  |

|                       |    |       |           |      |                    |         |                    |         |                    |         |
|-----------------------|----|-------|-----------|------|--------------------|---------|--------------------|---------|--------------------|---------|
|                       | Q4 | 22056 | 335(1.63) | 2.40 | 1.378(1.162-1.634) | 0.0002  | 1.271(1.070-1.511) | 0.0065  | 1.237(1.041-1.471) | 0.0159  |
| <b>CKD</b>            |    |       |           |      |                    | 0.5380† |                    | 0.5827† |                    | 0.5637† |
| Yes                   | Q1 | 1987  | 44(2.09)  | 3.38 | 1(reference)       |         | 1(reference)       |         | 1(reference)       |         |
|                       | Q2 | 1842  | 43(2.32)  | 3.66 | 1.061(0.697-1.616) | 0.7818  | 1.050(0.689-1.600) | 0.8196  | 1.049(0.689-1.599) | 0.8222  |
|                       | Q3 | 2067  | 57(3.00)  | 4.31 | 1.203(0.812-1.783) | 0.3572  | 1.157(0.779-1.716) | 0.4701  | 1.148(0.773-1.704) | 0.4937  |
|                       | Q4 | 2463  | 95(3.71)  | 6.01 | 1.732(1.212-2.476) | 0.0026  | 1.548(1.068-2.243) | 0.0209  | 1.518(1.047-2.201) | 0.0277  |
| No                    | Q1 | 22648 | 185(0.79) | 1.29 | 1(reference)       |         | 1(reference)       |         | 1(reference)       |         |
|                       | Q2 | 22792 | 212(0.85) | 1.50 | 1.113(0.914-1.355) | 0.2883  | 1.095(0.899-1.334) | 0.3681  | 1.096(0.900-1.335) | 0.3619  |
|                       | Q3 | 22589 | 254(1.05) | 1.81 | 1.249(1.033-1.509) | 0.0217  | 1.204(0.996-1.455) | 0.0554  | 1.193(0.987-1.443) | 0.0684  |
|                       | Q4 | 22166 | 328(1.67) | 2.34 | 1.442(1.203-1.727) | <0.0001 | 1.218(1.012-1.467) | 0.0369  | 1.190(0.989-1.433) | 0.0660  |
| <b>BMI</b>            |    |       |           |      |                    | 0.5458† |                    | 0.4064† |                    | 0.3640† |
| <25 kg/m <sup>2</sup> | Q1 | 13175 | 100(0.72) | 1.91 | 1(reference)       |         | 1(reference)       |         | 1(reference)       |         |
|                       | Q2 | 12869 | 111(0.82) | 1.38 | 1.142(0.871-1.496) | 0.3363  | 1.121(0.855-1.469) | 0.4091  | 1.128(0.861-1.479) | 0.3820  |
|                       | Q3 | 12757 | 138(1.02) | 1.73 | 1.314(1.016-1.700) | 0.0378  | 1.287(0.995-1.666) | 0.0547  | 1.293(0.999-1.673) | 0.0511  |
|                       | Q4 | 11908 | 186(1.75) | 2.46 | 1.670(1.310-2.131) | <0.0001 | 1.410(1.098-1.810) | 0.0071  | 1.412(1.099-1.813) | 0.0069  |
| ≥25 kg/m <sup>2</sup> | Q1 | 11460 | 129(1.09) | 1.78 | 1(reference)       |         | 1(reference)       |         | 1(reference)       |         |
|                       | Q2 | 11774 | 144(1.13) | 1.98 | 1.056(0.833-1.340) | 0.6517  | 1.047(0.825-1.328) | 0.7064  | 1.052(0.830-1.335) | 0.6736  |
|                       | Q3 | 11899 | 173(1.41) | 2.34 | 1.164(0.926-1.462) | 0.1925  | 1.121(0.892-1.408) | 0.3288  | 1.113(0.885-1.398) | 0.3605  |
|                       | Q4 | 12721 | 237(2.01) | 2.96 | 1.338(1.079-1.659) | 0.0079  | 1.155(0.926-1.441) | 0.1999  | 1.127(0.903-1.407) | 0.2887  |

\*IR (incidence rate) presented as per 1000 person-years

†P for interaction

Model 1, adjusted for age and sex

Model 2, Model 1 + RHR, LDL-C, HDL-C, baseline FPG, hypotensive drugs, hypoglycemic drugs, hypertension and diabetes mellitus

Model 3, Model 2 + SBP, DBP, BMI, Hs-CRP, smoking status, drinking status, and physical exercise

Abbreviations: CI, confidence interval; HR, hazard ratio; RHR, resting heart rate; DBP, diastolic blood pressure; SBP, systolic blood pressure; LDL-C, low-density lipoprotein cholesterol; HDL-C, high-density lipoprotein cholesterol; BMI, body mass index; Hs-CRP, High-sensitivity C-reactive protein; FPG, fasting plasma glucose.

**Table S8. Subgroup Analyses (Impact of Standard Deviation of Fasting Plasma Glucose Levels Q4)**

| Variables  | Group | Patients,<br>n | Events,<br>case, n (%) | IR*  | Model 1<br>HR (95%CI) | P value | Model 2<br>HR (95%CI) | P value | Model 3<br>HR (95%CI) | P value |
|------------|-------|----------------|------------------------|------|-----------------------|---------|-----------------------|---------|-----------------------|---------|
| <b>Age</b> |       |                |                        |      |                       | 0.1045† |                       | 0.1266† |                       | 0.1184† |
| <65 y      | Q1    | 21459          | 120(0.55)              | 0.88 | 1(reference)          |         | 1(reference)          |         | 1(reference)          |         |
|            | Q2    | 21098          | 124(0.56)              | 0.94 | 1.046(0.814-1.344)    | 0.7257  | 1.143(0.875-1.494)    | 0.3267  | 1.139(0.872-1.489)    | 0.3401  |
|            | Q3    | 20139          | 132(0.66)              | 1.05 | 1.086(0.848-1.391)    | 0.5119  | 1.242(0.968-1.593)    | 0.0879  | 1.219(0.950-1.563)    | 0.1200  |
|            | Q4    | 19417          | 240(1.24)              | 1.95 | 1.828(1.467-2.278)    | <0.0001 | 1.466(1.159-1.854)    | 0.0014  | 1.300(1.017-1.661)    | 0.0362  |
| ≥65 y      | Q1    | 3342           | 104(3.05)              | 4.95 | 1(reference)          |         | 1(reference)          |         | 1(reference)          |         |
|            | Q2    | 3670           | 115(3.33)              | 5.11 | 1.036(0.794-1.350)    | 0.7955  | 1.031(0.791-1.345)    | 0.8196  | 1.030(0.790-1.343)    | 0.8290  |
|            | Q3    | 4223           | 155(3.63)              | 6.00 | 1.225(0.956-1.571)    | 0.1093  | 1.207(0.941-1.548)    | 0.1392  | 1.202(0.937-1.543)    | 0.1472  |
|            | Q4    | 5206           | 228(4.32)              | 7.07 | 1.471(1.166-1.855)    | 0.0011  | 1.312(1.028-1.673)    | 0.0289  | 1.286(1.007-1.642)    | 0.0439  |
| <b>Sex</b> |       |                |                        |      |                       | 0.2211† |                       | 0.3774† |                       | 0.4823† |
| Male       | Q1    | 19122          | 192(0.99)              | 1.57 | 1(reference)          |         | 1(reference)          |         | 1(reference)          |         |
|            | Q2    | 19031          | 204(1.07)              | 1.71 | 1.053(0.865-1.282)    | 0.6078  | 1.042(0.855-1.269)    | 0.6855  | 1.042(0.855-1.269)    | 0.6832  |
|            | Q3    | 19387          | 252(1.33)              | 2.07 | 1.205(0.999-1.454)    | 0.0517  | 1.165(0.966-1.407)    | 0.1106  | 1.155(0.957-1.394)    | 0.1342  |
|            | Q4    | 20148          | 392(1.94)              | 3.07 | 1.618(1.361-1.924)    | <0.0001 | 1.354(1.130-1.622)    | 0.0010  | 1.318(1.100-1.580)    | 0.0028  |
| Female     | Q1    | 5678           | 32(0.55)               | 0.91 | 1(reference)          |         | 1(reference)          |         | 1(reference)          |         |
|            | Q2    | 5737           | 35(0.62)               | 1.00 | 1.015(0.629-1.640)    | 0.9508  | 1.028(0.636-1.662)    | 0.9112  | 1.024(0.633-1.656)    | 0.9239  |

|                          |    |       |           |      |                    |         |                    |         |                    |         |
|--------------------------|----|-------|-----------|------|--------------------|---------|--------------------|---------|--------------------|---------|
|                          | Q3 | 4975  | 35(0.74)  | 1.15 | 0.976(0.604-1.578) | 0.9223  | 0.934(0.577-1.512) | 0.7821  | 0.917(0.566-1.484) | 0.7232  |
|                          | Q4 | 4475  | 76(1.66)  | 2.75 | 1.991(1.315-3.013) | 0.0011  | 1.380(0.885-2.151) | 0.1554  | 1.279(0.818-2.001) | 0.2808  |
| <b>Hypertension</b>      |    |       |           |      |                    | 0.2594† |                    | 0.2226† |                    | 0.2159† |
| Yes                      | Q1 | 3204  | 62(1.74)  | 3.06 | 1(reference)       |         | 1(reference)       |         | 1(reference)       |         |
|                          | Q2 | 3441  | 65(2.20)  | 3.06 | 0.956(0.675-1.354) | 0.8016  | 0.969(0.684-1.372) | 0.8575  | 0.976(0.688-1.382) | 0.8895  |
|                          | Q3 | 3819  | 104(2.65) | 4.42 | 1.360(0.993-1.863) | 0.0553  | 1.358(0.991-1.863) | 0.0573  | 1.356(0.988-1.860) | 0.0590  |
|                          | Q4 | 5026  | 171(3.38) | 5.46 | 1.620(1.212-2.167) | 0.0011  | 1.395(1.023-1.901) | 0.0352  | 1.382(1.013-1.886) | 0.0412  |
| No                       | Q1 | 21597 | 162(0.76) | 1.18 | 1(reference)       |         | 1(reference)       |         | 1(reference)       |         |
|                          | Q2 | 21327 | 174(0.76) | 1.31 | 1.074(0.867-1.330) | 0.5131  | 1.084(0.875-1.342) | 0.4624  | 1.074(0.867-1.330) | 0.5138  |
|                          | Q3 | 20543 | 183(0.94) | 1.43 | 1.064(0.861-1.315) | 0.5658  | 1.061(0.858-1.311) | 0.5849  | 1.039(0.841-1.285) | 0.7216  |
|                          | Q4 | 19597 | 297(1.51) | 2.40 | 1.585(1.309-1.921) | <0.0001 | 1.366(1.119-1.667) | 0.0021  | 1.305(1.069-1.593) | 0.0090  |
| <b>Diabetes mellitus</b> |    |       |           |      |                    | 0.5170† |                    | 0.4708† |                    | 0.4362† |
| Yes                      | Q1 | 327   | 5(1.59)   | 2.42 | 1(reference)       |         | 1(reference)       |         | 1(reference)       |         |
|                          | Q2 | 331   | 12(3.10)  | 5.82 | 2.320(0.818-6.586) | 0.1138  | 2.287(0.806-6.493) | 0.1202  | 2.348(0.826-6.671) | 0.1092  |
|                          | Q3 | 533   | 16(2.71)  | 4.93 | 1.944(0.712-5.307) | 0.1945  | 1.858(0.680-5.076) | 0.2272  | 1.838(0.672-5.027) | 0.2357  |
|                          | Q4 | 3197  | 112(3.61) | 5.75 | 2.325(0.949-5.696) | 0.0650  | 2.050(0.831-5.057) | 0.1190  | 2.028(0.821-5.009) | 0.1251  |
| No                       | Q1 | 24474 | 219(0.88) | 1.41 | 1(reference)       |         | 1(reference)       |         | 1(reference)       |         |
|                          | Q2 | 24437 | 227(0.93) | 1.49 | 1.020(0.847-1.228) | 0.8323  | 1.010(0.839-1.216) | 0.9167  | 1.007(0.836-1.212) | 0.9419  |
|                          | Q3 | 23829 | 271(1.17) | 1.82 | 1.147(0.960-1.371) | 0.1315  | 1.117(0.934-1.335) | 0.2254  | 1.103(0.923-1.319) | 0.2796  |

|                       |    |       |           |      |                    |         |                    |         |                    |         |
|-----------------------|----|-------|-----------|------|--------------------|---------|--------------------|---------|--------------------|---------|
|                       | Q4 | 21426 | 356(1.63) | 2.62 | 1.500(1.267-1.775) | <0.0001 | 1.343(1.130-1.595) | 0.0008  | 1.289(1.085-1.533) | 0.004   |
| <b>CKD</b>            |    |       |           |      |                    | 0.7320† |                    | 0.7316† |                    | 0.7186† |
| Yes                   | Q1 | 1977  | 39(2.09)  | 3.00 | 1(reference)       |         | 1(reference)       |         | 1(reference)       |         |
|                       | Q2 | 1899  | 49(2.32)  | 4.05 | 1.301(0.854-1.981) | 0.2206  | 1.297(0.851-1.975) | 0.2262  | 1.292(0.848-1.968) | 0.2330  |
|                       | Q3 | 1973  | 53(3.00)  | 4.21 | 1.343(0.888-2.032) | 0.1618  | 1.298(0.857-1.964) | 0.2183  | 1.283(0.847-1.944) | 0.2391  |
|                       | Q4 | 2510  | 98(3.71)  | 6.07 | 1.939(1.338-2.811) | 0.0005  | 1.675(1.128-2.488) | 0.0106  | 1.638(1.102-2.436) | 0.0147  |
| No                    | Q1 | 22824 | 185(0.79) | 1.28 | 1(reference)       |         | 1(reference)       |         | 1(reference)       |         |
|                       | Q2 | 22869 | 190(0.85) | 1.33 | 0.999(0.816-1.224) | 0.9941  | 0.989(0.808-1.212) | 0.9182  | 0.985(0.805-1.207) | 0.8874  |
|                       | Q3 | 22389 | 234(1.05) | 1.68 | 1.145(0.944-1.389) | 0.1683  | 1.104(0.910-1.339) | 0.3149  | 1.092(0.900-1.325) | 0.3723  |
|                       | Q4 | 22113 | 370(1.67) | 2.66 | 1.610(1.349-1.922) | <.0001  | 1.307(1.086-1.573) | 0.0046  | 1.260(1.047-1.517) | 0.0146  |
| <b>BMI</b>            |    |       |           |      |                    | 0.3439† |                    | 0.2514† |                    | 0.2419† |
| <25 kg/m <sup>2</sup> | Q1 | 13524 | 100(0.72) | 1.61 | 1(reference)       |         | 1(reference)       |         | 1(reference)       |         |
|                       | Q2 | 13093 | 108(0.82) | 1.32 | 1.114(0.849-1.462) | 0.4374  | 1.095(0.834-1.438) | 0.5129  | 1.099(0.837-1.443) | 0.4970  |
|                       | Q3 | 12573 | 124(1.02) | 1.58 | 1.210(0.929-1.574) | 0.1571  | 1.177(0.904-1.532) | 0.2256  | 1.182(0.908-1.539) | 0.2145  |
|                       | Q4 | 11510 | 203(1.75) | 2.78 | 1.891(1.488-2.404) | <.0001  | 1.522(1.183-1.958) | 0.0011  | 1.519(1.180-1.955) | 0.0012  |
| ≥25 kg/m <sup>2</sup> | Q1 | 11277 | 124(1.09) | 1.74 | 1(reference)       |         | 1(reference)       |         | 1(reference)       |         |
|                       | Q2 | 11675 | 131(1.13) | 1.81 | 0.981(0.768-1.255) | 0.8807  | 0.982(0.768-1.256) | 0.8869  | 0.987(0.772-1.261) | 0.9149  |
|                       | Q3 | 11789 | 163(1.41) | 2.22 | 1.121(0.887-1.416) | 0.3385  | 1.084(0.858-1.370) | 0.4997  | 1.074(0.850-1.358) | 0.5485  |
|                       | Q4 | 13113 | 265(2.01) | 3.22 | 1.452(1.172-1.798) | 0.0006  | 1.214(0.971-1.519) | 0.0887  | 1.177(0.940-1.473) | 0.1546  |

\*IR (incidence rate) presented as per 1000 person-years

†P for interaction

Model 1, adjusted for age and sex

Model 2, Model 1 + RHR, LDL-C, HDL-C, baseline FPG, hypotensive drugs, hypoglycemic drugs, hypertension and diabetes mellitus

Model 3, Model 2 + SBP, DBP, BMI, Hs-CRP, smoking status, drinking status, and physical exercise

Abbreviations: CI, confidence interval; HR, hazard ratio; RHR, resting heart rate; DBP, diastolic blood pressure; SBP, systolic blood pressure; LDL-C, low-density lipoprotein cholesterol; HDL-C, high-density lipoprotein cholesterol; BMI, body mass index; Hs-CRP, High-sensitivity C-reactive protein; FPG, fasting plasma glucose.
